# Supplementary material for: Green Preparation of High Yield Fluorescent Graphene Quantum Dots from Coal-Tar-Pitch by Mild Oxidation
Source: PubMed Central journal article supplement (PMC6215232; doi:10.3390/nano8100844), 2018-10-17
Supplement: nanomaterials-08-00844-s001.pdf [file nanomaterials-08-00844-s001.pdf]

## Supplementary Information

# Green Preparation of High Yield Fluorescent Graphene Quantum Dots from Coal-Tar-Pitch by Mild Oxidation

Quanrun Liu <sup>1,\*</sup>, Jingjie Zhang <sup>1</sup>, He He <sup>1</sup>, Guangxu Huang <sup>1,2,3</sup>, Baolin Xing <sup>1</sup>, Jianbo Jia <sup>1</sup> and Chuanxiang Zhang <sup>1,\*</sup>

<sup>1</sup> College of Chemistry and Chemical Engineering, Henan Polytechnic University, Jiaozuo 454003, China; zhangjingjie1221@163.com (J.Z.); hpuhehe@163.com (H.H.); guangxu1369@163.com (G.H.); baolinxing@hpu.edu.cn (B.X.); jiajianbo@hpu.edu.cn (J.J.)

<sup>2</sup> Collaborative Innovation Center of Coal Work Safety of Henan Province, Jiaozuo 454003, China

<sup>3</sup> Henan Key Laboratory of Coal Green Conversion, Jiaozuo 454003, China

\* Correspondence: qrlu@163.com (Q.L.); zcx223@hpu.edu.cn (C. Z.); Tel.: +86-10-0391-3986816 (C.Z.); Fax: +86-10-0391-3986810 (C.Z.)

**Table S1.** Summary of surface element content of CTP and GQDs by XPS analysis.

| Sample | Elements (%) |       |      |      |
|--------|--------------|-------|------|------|
|        | C            | O     | N    | S    |
| CTP    | 93.54        | 3.58  | 2.62 | 0.26 |
| GQDs-1 | 69.30        | 29.84 | 0.77 | 0.09 |
| GQDs-2 | 58.85        | 40.10 | 0.98 | 0.07 |

**Table S2.** Summary of C chemical bonds form in the surface of CTP and GQDs.

| Chemical bond type | Chemical bond proportion (%) |        |        |
|--------------------|------------------------------|--------|--------|
|                    | CTP                          | GQDs-1 | GQDs-2 |
| Csp <sup>2</sup>   | 51.30                        | 37.30  | 30.98  |
| Csp <sup>3</sup>   | 39.49                        | 23.59  | 20.35  |
| C-O                | 9.21                         | 12.04  | 8.00   |
| C=O                | -                            | 5.86   | 18.28  |
| COOH               | -                            | 21.21  | 22.37  |

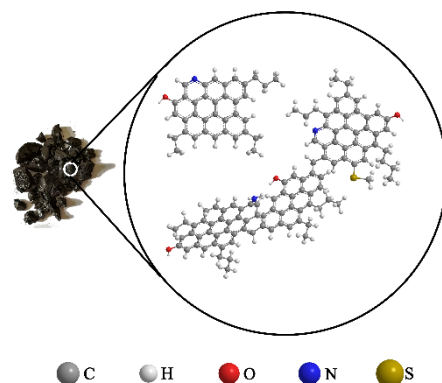

**Fig. S1.** Macroscale image and simplified illustrative molecular structure of CTP.

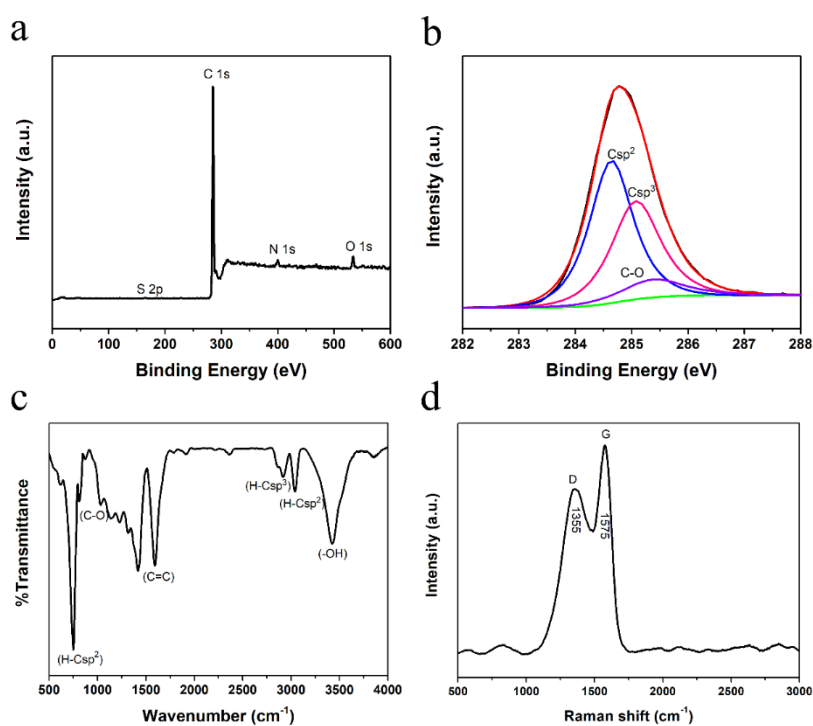

**Fig. S2.** Characterization of CTP. (a) XPS survey of CTP. (b) High resolution C 1s XPS spectrum of CTP displayed presence of Csp<sup>2</sup>, Csp<sup>3</sup> and C–O modes at 284.6 eV, 285.1 eV and 285.4 eV, respectively. (c) ssFTIR spectrum of CTP showing H–Csp<sup>2</sup>, C–O, C=C, H–Csp<sup>3</sup> and O–H vibration modes at 750/3040 cm<sup>-1</sup>, 1032 cm<sup>-1</sup>, 1593 cm<sup>-1</sup>, 2917 cm<sup>-1</sup> and 3426 cm<sup>-1</sup> as labeled, respectively. (d) Raman spectrum of CTP under excitation of 532 nm.

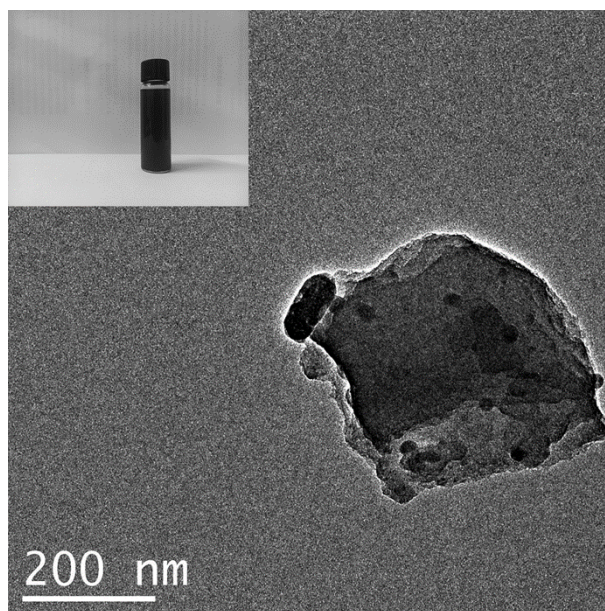

**Fig. S3.** TEM image of CTP after ultrasonication in hydrogen peroxide for 2 h. Inset is the optical image.

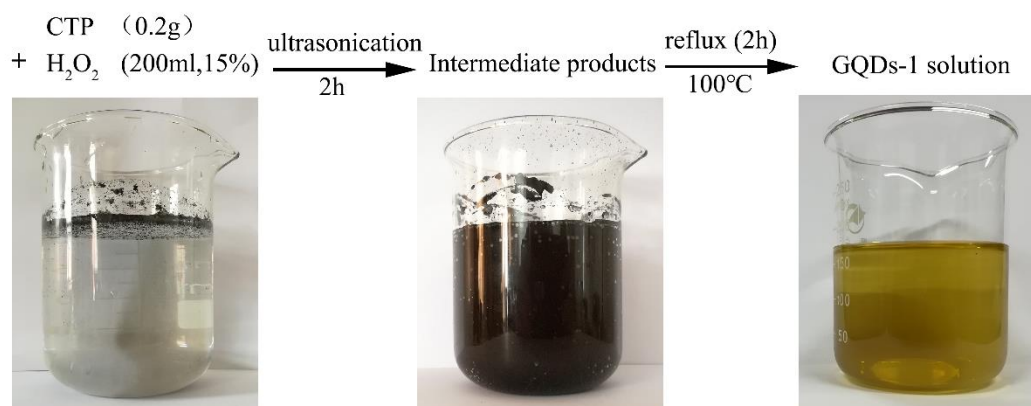

**Fig. S4.** Preparation procedure of GQDs-1.

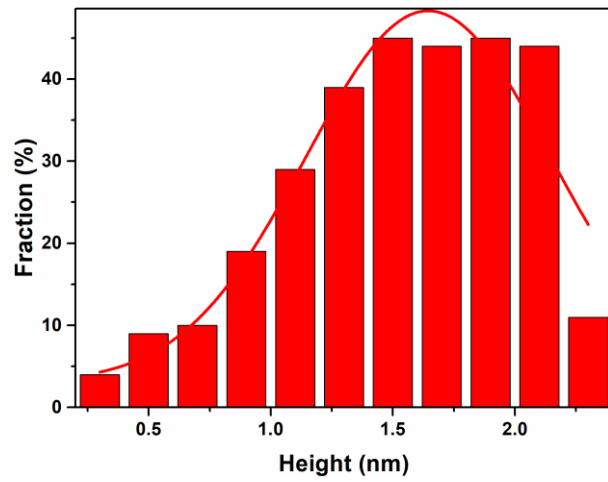

Fig. S5. The height distribution of the GQDs-1.

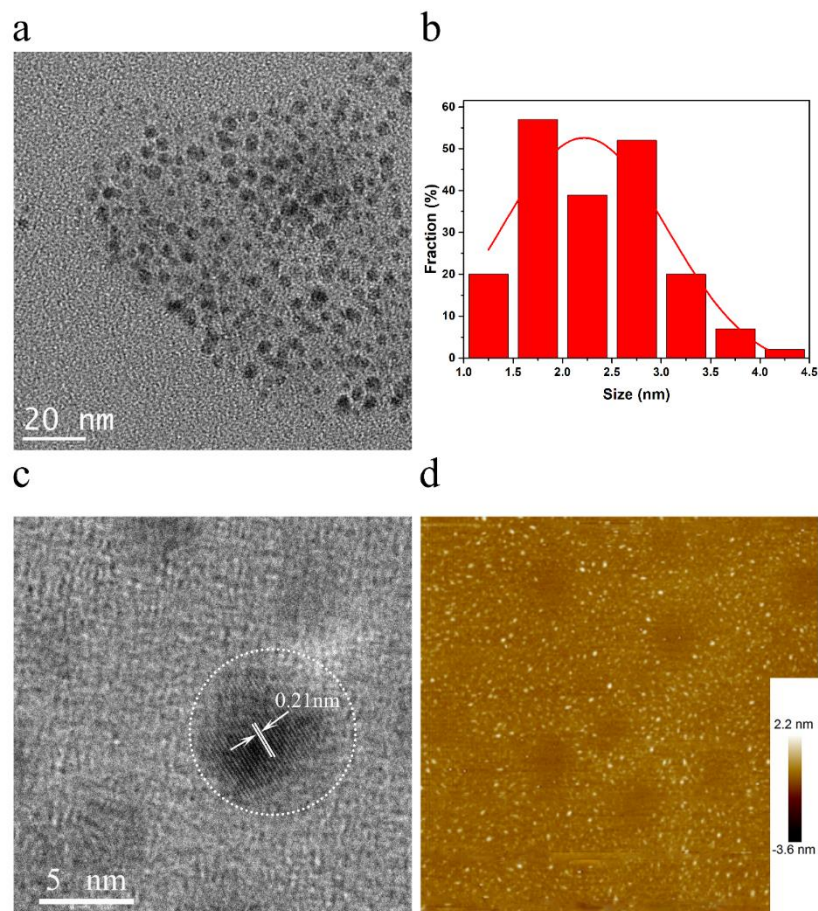

Fig. S6. Characterization of GQDs-2. (a) TEM image of GQDs-2 displaying a regular size and shape distribution. Scale bar, 20 nm. (b) The size distribution histogram of GQDs-2. (c) HRTEM image of representative GQDs-2 from a. (d) AFM image of GQDs-2.

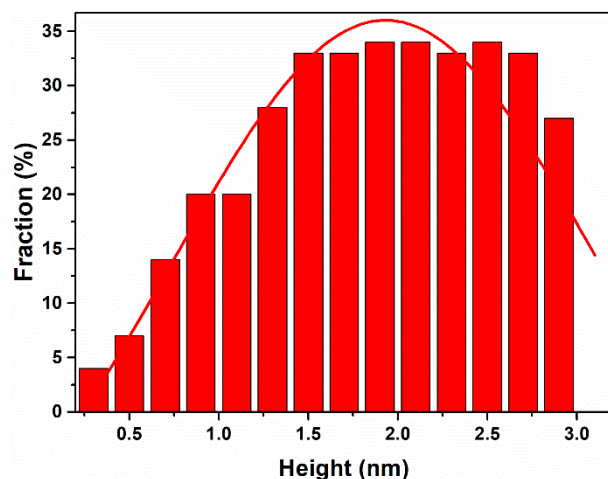

Fig. S7. The height distribution of the GQDs-2.

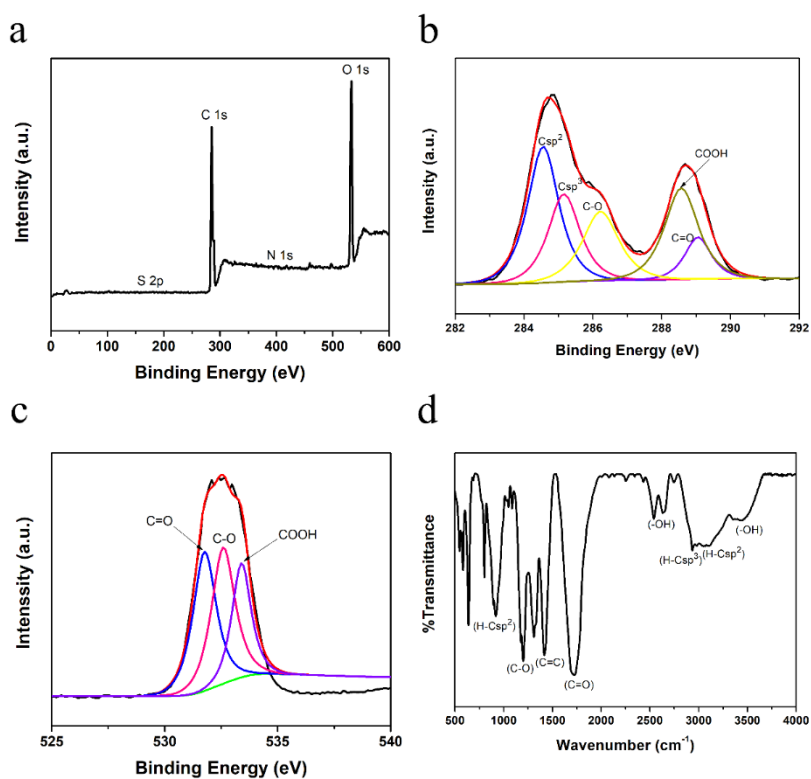

Fig. S8. Characterization of GQDs-2. (a) XPS survey of GQDs-2. (b) High-resolution C 1s XPS spectrum of GQDs-2. (c) The high-resolution O 1s XPS spectrum of GQDs-2. (d) ssFTIR spectrum of GQDs-2 showing different vibration modes as labeled.

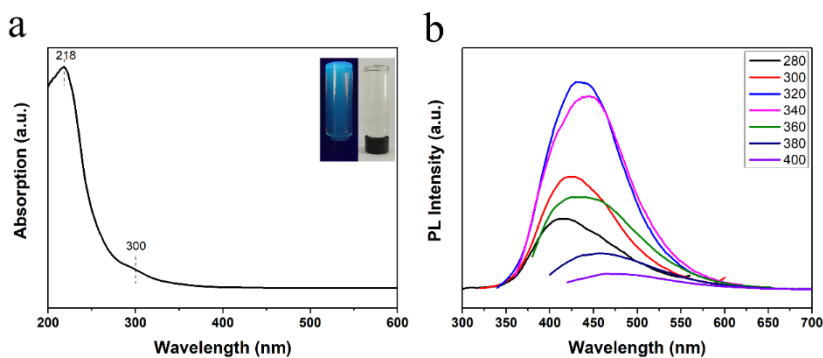

**Fig. S9.** Optical properties of the GQDs-2. (a) UV-Visible spectrum of the GQDs-2 dispersed in water. Inset of panel a: the left is a photograph of the corresponding GQDs-2 aqueous solution under UV light with 365 nm excitation; the right is a photograph of the corresponding GQDs-2 aqueous solution taken under visible light. (b) PL spectra of the GQDs-2 solution under different excitation wavelengths.

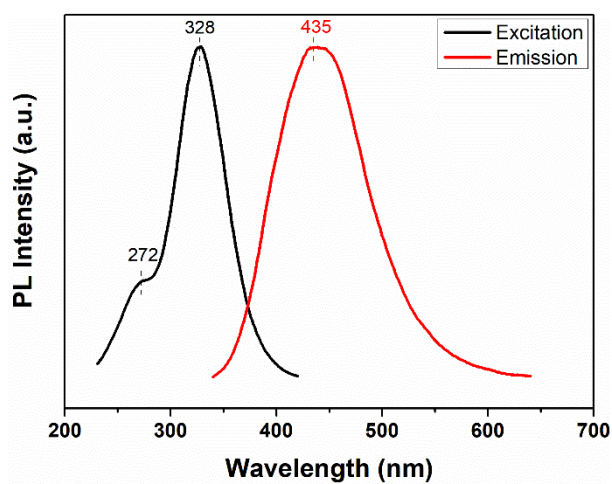

**Fig. S10.** PLE spectrum of GQDs-2 with the detection wavelength of 430 nm and PL spectrum excited at 328 nm.
